# Supplementary material for: Connecting laboratory behavior to field function through stable isotope analysis
Source: PeerJ. 2016 Apr 11;4:e1918. doi: 10.7717/peerj.1918 (PMC4830243; doi:10.7717/peerj.1918)
Supplement: Data S1 — Raw data used in our analyses. [file peerj-04-1918-s001.xlsx]

## Sheet: Crayfish
Crayfish	Date Caught	Carapace Length	Claw Length	Claw Width	Weight	Form	Score 1	Score 2	Score 3	Total	Average	Rank:	δ15N	δ13C	wt %N	wt %C	C:N	% Snail	Decimal	% Mussel	Decimal	TP(3.4)
1	2015-06-16	24.41	15.25	5.55	4.1	2	28	8	-32	4	1.33333	33	10.6513	-28.92	13.12	42.86	3.26677	73.9861	0.739861	26.0139	0.260139	2.17873
2	2015-06-16	27.22	18.94	7.31	6.3	2	-18	40	16	38	12.6667	29	11.0503	-28.891	13.2	43.93	3.32803	74.6935	0.746935	25.3065	0.253065	2.29288
3	2015-06-16	27.46	19.54	7.66	6.5	2	42	6	68	116	38.6667	16	11.2773	-29.147	12.64	43.16	3.41456	68.449	0.68449	31.551	0.31551	2.38795
4	2015-06-16	23.64	16.33	6.59	3.9	2	-18	-5	-7	-30	-10	37	11.1443	-29.724	13.05	43.27	3.31571	54.3744	0.543744	45.6256	0.456256	2.41264
5	2015-06-16	24.74	14.05	5.02	4.1	2	15	-17	-32	-34	-11.3333	38	10.7403	-28.533	14.22	46.04	3.23769	83.426	0.83426	16.574	0.16574	2.16211
6	2015-06-16	25.15	17.74	7.47	5.6	2	5	-22	-7	-24	-8	35	11.1983	-29.605	13.01	44.64	3.43121	57.2771	0.572771	42.7229	0.427229	2.41537
7	2015-06-16	25.09	15.59	6.11	4.9	2	25	69	21	115	38.3333	17	11.0303	-28.95	12.24	40.76	3.33007	73.2543	0.732543	26.7457	0.267457	2.29352
8	2015-06-16	23.41	16.66	7.24	4.6	2	40	119	24	183	61	7	11.1653	-29.144	11.9	40.9	3.43697	68.5221	0.685221	31.4779	0.314779	2.35468
9	2015-06-16	26.77	18.13	7.51	6.3	2	57	33	27	117	39	15	11.1443	-29.497	14.35	47.7	3.32404	59.9115	0.599115	40.0885	0.400885	2.38754
10	2015-06-16	25.22	16.5	6.67	5.1	2	70	127	16	213	71	3	10.9403	-28.192	12.86	44.59	3.46734	91.7439	0.917439	8.25609	0.0825609	2.18323
11	2015-06-16	23.9	16.84	7.02	4.7	2	-2	47	44	89	29.6667	20	11.1433	-29.904	12.52	41.86	3.34345	49.9837	0.499837	50.0163	0.500163	2.43226
12	2015-06-16	26.82	19.3	7.65	6.3	2	56	34	23	113	37.6667	19	11.1633	-28.863	13.96	46.51	3.33166	75.3765	0.753765	24.6235	0.246235	2.32302
13	2015-06-16	27.04	19.02	8.3	6.1	2	24	-10	70	84	28	22	11.3283	-29.183	11.53	38.86	3.37034	67.5708	0.675708	32.4292	0.324292	2.40694
14	2015-06-16	24.19	15.36	6.9	4	2	58	2	-7	53	17.6667	27	10.8023	-29.569	12.15	39.84	3.27901	58.1553	0.581553	41.8447	0.418447	2.29492
15	2015-06-16	25.42	18.59	7.19	4.6	2	37	85	7	129	43	13	11.0433	-29.475	11.42	38.9	3.4063	60.4482	0.604482	39.5518	0.395518	2.3554
16	2015-06-16	25.36	18.01	7.15	4.9	2	51	105	84	240	80	2	11.3023	-29.279	13.49	46	3.40993	65.2291	0.652291	34.7709	0.347709	2.40991
17	2015-06-16	24.43	16.25	6.77	4.8	2	-21	85	6	70	23.3333	24	11.4003	-29.678	12.1	41.49	3.42893	55.4965	0.554965	44.5035	0.445035	2.48285
18	2015-06-16	24.96	18.57	8.13	4.9	2	-12	-18	-31	-61	-20.3333	39	10.5433	-28.466	13.78	45.16	3.27721	85.0603	0.850603	14.9397	0.149397	2.09676
19	2015-06-16	23.44	14.92	6.17	3.7	2	-21	-28	-21	-70	-23.3333	40	11.2083	-28.795	12.93	42.47	3.28461	77.0352	0.770352	22.9648	0.229648	2.32874
20	2015-06-16	27.1	21.36	8.31	6.1	2	57	86	62	205	68.3333	4	10.9863	-28.765	11.72	40.89	3.48891	77.7669	0.777669	22.2331	0.222331	2.26012
21	2015-06-16	25.53	17.86	8.26	5.4	2	53	87	61	201	67	6	10.5603	-28.923	12.62	42.1	3.33597	73.9129	0.739129	26.0871	0.260871	2.1523
22	2015-06-16	25.68	19.08	8.27	5.8	2	28	75	75	178	59.3333	8	11.1023	-28.557	13.55	48	3.54244	82.8406	0.828406	17.1594	0.171594	2.27124
23	2015-06-16	23.78	15.81	6.45	4.4	2	35	-8	5	32	10.6667	30	11.0503	-29.154	12.22	40.23	3.29214	68.2782	0.682782	31.7218	0.317218	2.32196
24	2015-06-16	24.12	14.96	6.4	4.3	2	14	-36	-7	-29	-9.66667	36	10.7863	-28.457	12.49	42.02	3.36429	85.2799	0.852799	14.7201	0.147201	2.16724
25	2015-06-16	26.02	16.78	6.76	5	2	73	117	52	242	80.6667	1	11.3923	-28.57	12.28	41.9	3.41205	82.5235	0.825235	17.4765	0.174765	2.35797
26	2015-06-16	25	15.92	6.93	5	2	29	0	30	59	19.6667	26	11.2223	-29.544	11.78	39.71	3.37097	58.7651	0.587651	41.2349	0.412349	2.41568
27	2015-06-16	25.88	18.63	8.16	5.4	2	27	3	44	74	24.6667	23	11.7263	-28.999	13.13	45.48	3.46382	72.0591	0.720591	27.9409	0.279409	2.50365
28	2015-06-16	24.69	17.33	7.48	4.3	2	30	33	26	89	29.6667	21	11.4493	-30.15	13.2	43.74	3.31364	43.9832	0.439832	56.0168	0.560168	2.54946
29	2015-06-16	24.64	17.46	6.99	4.6	2	30	20	14	64	21.3333	25	11.0043	-28.88	13.06	44.46	3.40429	74.9618	0.749618	25.0382	0.250382	2.27813
30	2015-06-16	23.46	16.41	7.13	4.1	2	51	-28	8	31	10.3333	31	11.2523	-29.64	11.69	39.6	3.38751	56.4234	0.564234	43.5766	0.435766	2.43512
31	2015-06-16	26.01	18.5	7.94	5.3	2	76	8	37	121	40.3333	14	11.3503	-29.141	11.3	39.02	3.4531	68.5953	0.685953	31.4047	0.314047	2.40876
32	2015-06-16	25.6	16.37	6.38	5	2	49	-14	-27	8	2.66667	32	10.3603	-28.983	11.16	36.77	3.2948	72.4493	0.724493	27.5507	0.275507	2.10011
33	2015-06-16	26.44	19.01	8.29	5.7	2	67	40	71	178	59.3333	9	10.9563	-29.063	13.07	42.98	3.28845	70.4979	0.704979	29.5021	0.295021	2.28425
34	2015-06-16	24.76	16.72	7.46	4.4	2	58	34	23	115	38.3333	18	11.3693	-29.785	12.79	44.3	3.46364	52.8865	0.528865	47.1135	0.471135	2.48557
35	2015-06-16	27.38	19.62	7.62	6	2	55	89	60	204	68	5	10.9483	-29.404	13.61	44.93	3.30125	62.1801	0.621801	37.8199	0.378199	2.31961
36	2015-06-16	24.63	16.04	7.03	4.9	2	-9	8	-19	-20	-6.66667	34	11.5793	-29.785	11	36.83	3.34818	52.8865	0.528865	47.1135	0.471135	2.54733
37	2015-06-16	27.53	19.06	8.17	5.6	2	47	83	15	145	48.3333	12	10.7223	-29.882	12.65	41.58	3.28696	50.5204	0.505204	49.4796	0.494796	2.306
38	2015-06-16	26.66	19.23	8.17	5.5	2	26	57	65	148	49.3333	11	11.2923	-29.286	12.89	42.49	3.29635	65.0584	0.650584	34.9416	0.349416	2.40774
39	2015-06-16	27.23	19.05	8.03	6.1	2	53	76	30	159	53	10	11.5903	-29.442	11.76	40.16	3.41497	61.2531	0.612531	38.7469	0.387469	2.51264
40	2015-06-16	24.24	14.5	5.37	4.1	2	5	45	-7	43	14.3333	28	10.7673	-29.117	11.93	40.28	3.37636	69.1807	0.691807	30.8193	0.308193	2.23464
	Mean:	25.3763								min	-23.3333										min	2.09676
	SD:	1.25654								max	80.6667										max	2.54946
	Range	4.12								mean	29.9333										mean	2.33797
	Min	23.41								sd	28.6067										sd	0.118216
	Max	27.53

## Sheet: Snails, Mussels
Sample Number	Organism	# organisms/sample	δ15N	δ13C	wt %N	wt %C	C:N
51	Mussels	1	9.06117	-31.6543	12.7	47.61	3.74882
52	Mussels	1	8.89317	-31.9763	11.81	46.18	3.91025
53	Mussels	1	9.10917	-32.2773	11.51	46.65	4.053
54	Mussels	1	8.54117	-31.9043	12.27	46.16	3.76202
55	Mussels	1	8.91117	-31.9533	11.92	43.97	3.68876
56	Snails	9	10.3722	-26.3803	4.89	27.04	5.52965
57	Snails	9	10.3082	-28.5893	7.96	41.57	5.22236
58	Snails	9	10.5482	-28.1213	6.51	32.51	4.99386
59	Snails	9	10.4572	-28.2613	7.66	36.71	4.79243
60	Snails	9	10.5372	-27.9153	7.33	35.03	4.77899
		δ15N	δ13C
	AVG Snails	10.4446	-27.8535
	AVG Mussels	8.90317	-31.9531

## Sheet: Round 1
Date	Time	Temp	Match	Crayfish	Total	Scores
2015-07-17	07:19:00	19	15,18	15	37	2	3	4	1	2	2	2	2	1	2	2	1	2	2	2	2	2	1	2
				18	-12	3	4	-1	-1	-1	-1	-1	-1	-1	-1	-1	-1	-1	-1	-2	-1	-1	-1	-2
2015-07-17	07:30:00	19	27,20	27	27	3	-1	4	5	-2	1	-1	3	4	1	-1	-1	1	3	1	3	4
				20	57	3	1	4	5	1	4	1	2	3	1	3	1	4	1	3	4	1	2	1	1	3	1	3	4
2015-07-17	07:40:00	19	37,4	37	47	1	1	1	2	1	1	2	2	2	2	1	4	2	2	2	2	2	1	2	1	1	1	1	2	2	2	1	2	1
				4	-18	-1	-1	-1	1	2	-1	-1	2	-2	-2	-2	-1	1	-2	1	-2	-1	-1	-1	-2	2	-1	-1	-1	-1	-1	-1	1	-1
2015-07-17	07:50:00	19	16,12	16	51	4	2	1	3	4	5	-2	1	2	3	4	-1	1	1	-1	3	4	5	3	1	2	1	-1	-1	1	3	4	-1
				12	56	-1	1	3	4	5	2	3	4	1	1	1	2	3	4	5	3	1	1	1	1	2	2	3	4
2015-07-17	08:00:00	18	2,25	2	-18	-1	3	-1	-1	-1	-2	-2	-1	-1	-1	-1	-1	-1	3	-1	-1	-1	-1	-1	-1	-1	-1	1	3	-1	-1	-1	-1	-1	-1	-1	-1	-1	3
				25	73	1	1	2	3	2	2	2	2	2	2	2	2	2	2	2	3	1	2	2	2	2	2	1	2	1	2	3	2	1	1	2	1	1	2	2	2	3	2	2
2015-07-17	08:12:00	18	19,35	19	-21	3	-1	-1	-2	-1	-1	1	-2	-1	-1	-1	-1	-1	-1	-1	-1	-1	-1	-1	-1	-1	-2	-1	-1
				35	55	3	2	2	2	2	2	2	2	1	2	2	1	2	2	2	2	2	2	2	1	2	2	2	2	1	2	2	2	2
2015-07-17	08:24:00	18	6,10	6	5	3	4	5	-2	3	4	-2	-1	-1	-2	-1	-1	-1	-1	-1	-1	3	-2	-1	3	-1	1	3	-2	-1	-1	-1	-1	-2	3	-1
				10	70	1	1	3	4	5	1	3	4	1	2	2	2	2	2	2	1	2	2	3	2	1	3	2	3	2	1	2	2	2	2	1	3	1
2015-07-17	08:36:00	18	11,3	11	-2	3	-2	-2	1	3	-2	-1	-1	-1	-1	1	-1	-1	-1	-2	1	1	-1	-1	3	4	-2
				3	42	1	3	2	2	2	2	3	2	2	2	1	2	2	2	2	1	2	2	3	4
2015-07-17	08:48:00	18	1,5	1	28	2	3	2	3	1	3	2	1	1	1	1	1	1	1	2	3
				5	15	3	3	3	1	3	2	-1	-1	-1	-1	2	1	1	-1	-1	-1	3
2015-07-17	09:00:00	19	24,34	24	14	1	2	3	3	-2	1	-1	3	1	3	-1	3	-2	-1	-1	1	3	-1	3	-1	-1	-1	-1	-1	-1	-1	3	-1	3	-1	-1
				34	58	-1	2	3	-1	3	2	1	3	3	1	1	3	2	1	1	3	2	3	1	2	1	1	1	2	1	1	2	3	3	2	1	1	3	1
2015-07-17	09:10:00	19	33,7	33	67	3	4	5	5	2	2	2	3	4	2	3	2	3	4	2	1	3	2	2	2	2	2	3	2	1	1
				7	25	2	3	4	5	5	-1	-1	3	4	-2	-1	3	4	-1	3	-1	-2	-2	3	-1	-1	-1
2015-07-17	09:21:00	19	9,13	9	57	3	2	1	2	1	3	1	1	1	2	1	1	2	1	3	3	1	3	4	2	2	1	2	2	2	1	3	1	3	2
				13	24	2	3	1	-1	1	3	-1	1	1	1	-1	3	3	1	3	4	-1	-1	-1	1	-1	-1	-1	3	3	-1
2015-07-17	09:32:00	19	39,40	39	53	3	2	2	3	1	1	1	1	1	2	3	2	2	2	1	1	1	2	1	2	1	3	2	1	1	1	1	3	4	1	1
				40	5	1	1	2	3	-1	3	-1	-1	-1	-1	1	3	-1	-2	-1	-1	-1	-1	-1	-1	-1	-1	1	-1	-1	-1	3	4	-1	3
2015-07-17	09:43:00	19	32,22	32	49	1	3	2	1	2	3	2	2	1	2	2	3	-1	2	3	2	2	2	2	1	-1	2	2	3	2	2	2	2	2	3	-1	-1	-1	-1	-1	-1	-1
				22	28	-1	-1	1	1	-1	1	3	3	3	1	3	2	3	1	2	1	1	1	1	1	1	1
2015-07-17	09:54:00	19	36,31	36	-9	3	4	1	3	4	-1	-1	-1	-1	-1	1	-1	-1	-1	-1	-1	3	-1	-2	-1	-1	-2	-1	-1	-1	-1	-1	-1	-1	-1	3	-2	-1	-2	-1
				31	76	3	4	1	3	4	2	2	2	2	1	2	2	2	2	2	2	3	2	2	3	2	2	2	2	2	2	2	2	2	3	2	2	2	3
2015-07-17	10:05:00	19	8,29	8	40	3	3	1	1	3	2	3	3	1	2	1	2	1	3	1	2	1	3	1	3
				29	30	1	3	3	-1	1	3	-1	3	1	1	3	1	1	2	1	3	-1	-1	1	3	3
2015-07-17	10:16:00	18	30,28	30	51	1	3	3	3	4	1	1	3	2	1	2	1	2	3	1	2	1	3	4	3	-2	1	3	1	2	1	1
				28	30	1	3	3	3	4	-1	1	3	4	-1	-1	-1	-1	3	-1	1	1	3	4	3	-1	1	1	3	-1	-1	-1	-1	-1
2015-07-17	10:27:00	18	38,21	38	26	1	3	3	3	1	-1	1	-1	1	1	1	-2	1	-1	3	2	3	3	1	-2	-1	1	-1	1	1	3	-1	1	-1	3	-1	-1	1
				21	53	1	3	3	2	2	3	1	2	2	2	1	2	3	2	3	3	1	2	1	1	1	3	1	3	2	2	1
2015-07-17	10:38:00	18	17,23	17	-21	-1	1	-1	-2	-1	-1	-2	-1	-2	-2	1	-1	-1	-1	-1	-1	2	-1	-1	-1	-1	-1	-1	-1
				23	35	2	2	2	2	2	2	2	2	2	2	2	2	1	-1	1	1	2	2	2	1	2
2015-07-17	10:48:00	18	26,14	26	29	1	3	4	5	-2	1	3	-1	1	-1	3	-1	-2	-1	1	3	-1	3	-1	2	3	1	3	-1	3
				14	58	1	3	4	5	-2	1	3	2	1	1	2	1	3	1	4	1	1	3	1	1	3	2	2	3	1	3	2	2	3

## Sheet: Round 2
Date	Time	Temp	Match	Crayfish	Total	Scores
2015-07-17	11:30:00	20	14,9	14	2	3	-1	-1	3	2	3	-1	-1	-2	-2	1	-2	-1	1	-1	1	1	-1	1	3	-1	-1	-1	-2	2	-1
				9	33	1	3	2	2	1	3	1	1	1	1	1	1	1	1	1	2	1	3	2	1	1	1	1
2015-07-17	11:40:00	20	4,12	4	-5	-1	2	-2	1	-1	2	-1	1	-1	1	-2	-1	1	3	-2	-1	-1	1	-1	-2	1	-1	1	-1	1	1	-1	-1	-1
				12	34	2	2	2	2	2	2	2	3	2	1	2	2	2	2	1	2	2	1
2015-07-17	11:51:00	19	34,36	34	34	2	2	1	1	1	1	2	3	4	2	1	1	1	2	2	2	1	1	1	2	1
				36	8	1	-1	-1	1	1	3	4	-1	1	1	-1	1	-1	-1	-1	1	1	-1	1
2015-07-17	12:01:00	19	7,26	7	69	1	3	1	3	2	1	2	1	1	2	2	2	3	1	1	1	1	2	2	2	1	2	1	2	1	2	3	4	5	-2	4	5	2	1	2	2
				26	0	3	3	-1	-1	-1	-1	-1	-1	-1	-2	-1	-1	-1	-1	-1	-1	-1	-1	-1	1	-1	-1	3	4	5	-2	-2	4	5	-1	-1	-1	-1
2015-07-17	12:12:00	19	35,13	35	89	1	3	4	5	2	2	2	2	2	2	2	1	2	2	2	2	2	2	2	2	2	2	2	2	2	2	2	2	2	2	2	2	3	2	3	2	2	2	3	2	2
				13	-10	1	3	4	5	-1	-1	-1	-1	-1	-1	-1	-1	-1	-1	-1	-1	1	-1	-1	-1	-1	-1	-1	-1	-1	-1	-1	1	-1	-1	-1
2015-07-17	12:23:00	19	29,17	29	20	-1	3	4	3	5	3	4	-1	-1	-1	-1	-1	-1	-1	-1	-1	1	3	4	-1	-1	-1	-1	-1	3	-1	3
				17	85	1	2	2	3	2	3	3	4	3	5	3	4	2	2	2	2	2	2	1	2	2	2	2	3	4	1	2	3	2	2	2	3	2	2	3
2015-07-17	12:33:00	19	18,40	18	-18	1	1	-1	-2	-1	-1	-1	-1	-1	-1	-1	-2	-2	-2	-1	-2	1	-2
				40	45	2	2	2	2	2	2	2	2	2	2	2	2	2	2	2	2	2	2	2	2	3	2
2015-07-17	12:44:00	19	19,10	19	-28	-1	-1	3	-1	3	-1	-1	-1	-1	-1	-1	-1	-1	-1	-1	-1	-1	-1	-1	-1	3	-1	-1	-1	-1	-1	-1	-1	-1	-1	-1	-1	-1	-1	-1	-1	-1	-1	-1	-1	-1	-1	2
				10	127	1	2	1	2	1	3	2	3	2	3	4	2	2	2	2	2	2	2	2	2	2	2	2	2	1	2	2	2	3	2	2	2	2	3	2	2	2	2	2	2	3	2	2	2
2015-07-17	12:54:00	19	31,39	31	8	1	3	4	-2	-1	3	-1	-1	-2	-1	-1	1	-1	-1	3	-1	-1	3	4	4	5	-1	-1	-1	-1	-1	-1	-1	-1	-1	-1	-1	3	1	-1	-2
				39	76	1	3	4	2	3	2	2	2	1	1	1	1	2	2	2	1	2	3	1	2	1	2	3	4	4	5	2	2	1	1	1	1	1	1	1	1	1	1	3	1	1
2015-07-17	13:05:00	20	23,2	23	-8	1	3	-2	-1	-1	-1	-1	-1	-1	-2	-1	-2	1	2	3	-1	-1	-1	1	1	-1	-2	1	-2
				2	40	1	3	1	2	2	2	2	2	1	2	1	2	2	2	3	2	2	1	2	2	1	2
2015-07-17	13:15:00	20	30,15	30	-28	2	3	4	-1	-1	-1	-1	-1	-1	-1	-1	-2	-1	-1	-1	-1	-1	-1	-1	-1	-1	-1	-1	-1	-1	-1	-1	-1	-1	-2	1	-1	-1	-1	-1	-2	-1	-1	-1
				15	85	2	3	4	2	2	2	2	2	2	2	2	2	1	1	2	2	2	2	1	1	1	2	2	1	2	2	2	2	2	1	2	2	1	2	1	2	2	2	2	2	2	2	2	2
2015-07-17	13:26:00	20	11,21	11	47	1	3	3	-1	-1	-1	-1	1	3	4	5	3	4	3	4	4	3	4	5	-1	-1	-1	1	1	1	-1	1	3	-1	-2	1	3	-1	3	-1	-2	1	-1	-1	-1
				21	87	3	1	3	2	2	1	2	2	3	4	5	3	4	3	4	4	3	4	5	2	2	1	1	2	1	3	2	3	2	1	3	2	1	2	1
2015-07-17	13:37:00	20	33,5	33	40	1	3	2	2	2	2	2	2	2	1	2	1	2	2	2	2	1	1	1	1	2	2	2
				5	-17	2	3	-1	-2	-1	-2	-1	-2	-1	-1	-1	-1	-1	1	-1	-1	-1	-1	-1	-1	-1	-1	1	-1	-1	1	-1
2015-07-17	13:49:00	20	32,28	32	-14	1	2	3	-2	-1	-1	-1	-2	-1	-1	-1	-1	-1	-1	-1	-1	-1	-1	-1	-1	-1
				28	33	3	1	1	1	1	2	2	2	2	1	1	1	1	2	2	2	1	1	1	1	1	2	1
2015-07-17	13:59:00	20	16,6	16	105	1	3	4	1	2	3	2	2	2	2	2	2	2	1	2	2	2	2	2	1	2	2	2	2	2	2	2	3	4	5	-2	3	4	1	2	2	1	2	1	2	2	2	2	4
				6	-22	3	4	-1	-1	-1	3	-2	-1	-1	-1	-1	-1	-2	-2	-1	-1	-1	-1	-1	-1	-2	-1	-1	-1	-1	-1	-1	-1	-1	-1	3	4	5	3	4	-1	-2	1	-1	-2	-1	-1	-1	-1
2015-07-17	14:10:00	20	25,8	25	117	3	4	5	3	4	3	-2	3	4	-2	3	4	-2	3	4	5	-2	5	-2	3	4	5	3	-2	-2	4	5	4	5	-2	3	4	-2	5	2	3	1	2	3	4	5	-2	3	4
				8	119	3	4	5	3	4	3	-2	3	4	3	4	3	4	5	5	3	4	5	-2	-2	3	4	5	4	5	-2	3	4	5	-1	3	3	4	5	3	4	5	-2	3	4	-2
2015-07-17	14:20:00	20	38,27	38	57	3	1	1	1	1	1	2	2	2	3	2	2	1	1	1	1	2	2	2	1	2	3	2	2	2	2	1	1	2	2	4	2	2	2	3	4	-1	-1	-1	-2	-2	-2	-1	-1
				27	3	3	-1	-1	-1	-1	-1	-1	-1	-1	-1	-1	-1	-1	1	-1	-1	-1	-1	3	-1	-1	-1	-1	-1	-1	-1	-2	-1	-1	1	3	4	2	2	2	2	2	2	2	1
2015-07-17	14:32:00	20	24,37	24	-36	-1	-1	-1	-1	-1	1	3	-1	-1	-1	-1	-1	-1	-1	-1	-1	-1	-1	-1	-1	-1	-1	-1	-1	-1	-1	-2	-2	-1	-2	-1	-1	-1	-1	-1	-1	-1	-1	-1	-1	1
				37	83	1	1	2	2	2	2	1	3	2	2	2	2	2	2	2	2	2	2	2	3	1	2	2	2	2	2	2	2	2	2	2	2	2	1	1	2	1	1	2	2	1	2	2	2
2015-07-17	14:43:00	20	22,3	22	75	2	3	4	1	3	4	5	-2	4	3	3	2	1	2	2	4	1	2	2	2	2	2	1	1	1	2	1	2	3	2	2	2	2	2	2
				3	6	1	3	4	-2	1	1	3	4	5	-2	3	1	3	-1	-1	-1	-1	-1	-1	-1	1	-1	-2	-1	-1	-1	-1	-1	-1	3	-1	1	-1	-1	-1	-1	-1	-2
2015-07-17	14:54:00	20	20,1	20	86	1	1	1	2	3	4	1	2	3	4	4	2	4	1	1	2	2	4	1	1	1	1	1	1	2	3	2	4	2	4	4	4	1	2	3	4	3
				1	8	-1	3	4	-1	1	3	4	-2	4	-2	1	-2	-1	-1	-1	-1	-1	1	-1	-1	-1	1	-1	1	-1	-1	3	-2	3
[truncated: 17 more columns]

## Sheet: Round 3
Date	Time	Temp	Match	Crayfish	Total	Scores
2015-07-17	15:05:00	20	14,13	14	-7	1	1	1	3	4	5	-1	-1	-1	2	-1	-1	-1	-1	-1	-1	-1	-1	-1	-1	-1	-1	-1	-2	-1	-1	-1	-1	-2	-1	-1	-1	-2	3	2	1	2	-1	-1	-1
				13	70	1	1	-1	1	1	2	3	4	5	2	2	2	2	2	2	2	2	1	2	2	2	2	2	2	2	2	2	2	1	2	2	1	2	2	1	2	3	-2	-1	1	1	1
2015-07-17	15:16:00	20	23,29	23	5	2	2	-1	-1	1	-1	1	2	-1	-2	1	-1	-1	3	1
				29	14	1	1	-1	3	1	2	1	1	1	2	1	2	1	-2
2015-07-17	15:27:00	20	3,40	3	68	1	3	1	3	2	1	3	2	2	2	1	2	2	2	2	2	2	1	2	3	2	2	2	2	1	1	2	3	2	1	2	1	2	1	1	4
				40	-7	1	3	-1	2	3	-1	2	3	-1	-1	-1	-1	-1	-1	-1	-1	-1	-1	-1	-1	-1	3	1	-1	2	-1	-2	-1	3	-1	-1	-1	-1	-1	-1	-1	-1	-2
2015-07-17	15:37:00	20	35,5	35	60	1	2	2	1	2	2	2	2	2	1	2	2	2	1	1	1	2	2	1	2	1	1	2	2	2	2	2	2	2	1	2	2	2	2	2
				5	-32	1	2	-1	-1	-1	-1	-1	-1	-1	-1	-1	-2	-2	-1	-1	-2	1	-1	-1	-2	1	-1	-2	-2	-2	-2	-1	-1	-1	-1	-1	-2
2015-07-17	15:48:00	20	28,25	28	26	-2	1	3	4	3	2	2	2	2	3	2	2	2	1	3	4	5	-2	-1	1	3	-1	-1	-1	-1	1	-1	-1	-1	-1	-1	-1	-1	-2	-2
				25	52	1	1	3	4	-2	3	-1	-1	-1	-1	3	-1	-1	-1	1	3	4	5	-2	2	1	3	1	3	2	2	1	2	2	2	2	2	2	2	2	1	1	2
2015-07-17	15:58:00	20	11,18	11	44	1	1	1	2	2	1	2	4	1	1	2	2	2	1	2	2	2	2	1	1	1	2	1	2	1	2	2
				18	-31	-1	-1	-1	-1	-1	-1	-1	-2	-2	-1	-1	-1	-1	-1	-1	-2	-1	-1	-1	-1	-1	-1	-2	-2	-1	-1
2015-07-17	16:16:00	20	21,7	21	61	3	2	3	4	3	4	1	2	2	1	1	3	3	1	3	2	1	3	2	1	2	1	3	3	4	2	2	-1
				7	21	1	3	3	4	-1	1	-1	-2	1	3	1	3	-1	3	-1	-1	1	1	-1	3	-2	1	3	-2	1
2015-07-17	16:27:00	20	20,15	20	62	3	4	5	2	1	1	2	1	2	4	1	1	2	1	2	1	2	3	4	1	2	2	1	3	4	2	2	3
				15	7	3	4	5	-1	-1	-1	-1	-1	-1	-1	-1	-1	-1	-1	3	-1	-1	-1	1	-1	1	3	4	-1	-1
2015-07-17	16:37:00	20	24,12	24	-7	1	2	-1	-1	-1	-1	1	-1	1	-1	-1	-1	-2	1	-2	-1
				12	23	2	2	2	1	1	1	2	1	2	1	1	1	1	2	2	1
2015-07-17	16:48:00	20	27,10	27	44	3	3	4	2	1	1	3	2	2	1	2	2	1	1	2	2	2	3	3	4
				10	16	1	3	3	4	-1	-2	-1	2	3	-1	-1	-1	-1	-1	-1	-1	-1	2	-1	2	3	-1	3	4
2015-07-17	17:00:00	20	32,26	32	-27	1	1	1	1	-1	-1	-2	-1	-1	-2	-1	-2	-2	-2	-1	-2	-1	-2	-1	-2	-1	-2	-2	-2
				26	30	-1	2	2	1	1	2	2	2	2	2	1	2	2	2	2	2	2	2
2015-07-17	17:10:00	20	39,36	39	30	2	2	2	1	2	2	2	2	1	1	2	2	1	1	1	1	1	1	2	1
				36	-19	-1	-1	-1	-1	1	-1	-1	-1	1	-1	-1	-1	-1	-1	-1	-1	-1	-1	-2	-1	-1	-1
2015-07-17	17:23:00	20	8,17	8	24	1	1	1	3	3	4	2	2	1	1	2	1	1	1
				17	6	1	1	3	3	4	-1	-1	-1	-1	-1	-1
2015-07-17	17:34:00	20	6,2	6	-7	-1	-1	-1	-1	-1	-1	-1	-1	1	-1	1	-1	1	1	-1
				2	16	1	1	2	2	2	2	2	1	1	2
2015-07-17	17:44:00	20	31,30	31	37	-1	-1	-1	3	2	2	3	1	2	3	2	3	1	3	1	2	1	1	2	1	1	2	2	2
				30	8	1	2	1	2	3	-1	-1	1	-1	-1	1	-1	-1	1	3	1	-1	1	3	-1	1	-1	1	-1	-1	-1	-1	-1
2015-07-17	17:55:00	20	16,1	16	84	3	3	1	2	4	1	2	2	2	2	2	-1	2	2	2	2	2	2	-1	2	2	4	2	2	2	2	2	2	2	2	2	2	2	2	2	2	2	1	2	1	2	2	1	2
				1	-32	1	1	3	-1	1	-1	1	-1	-1	-1	-1	-1	-1	-1	-1	-1	-1	-1	-1	-1	-1	-1	-1	-1	-1	-1	-1	-1	-1	-1	-1	-1	-1	-1	-1	-1	-1	-1	-1	-1	-1	-1	-2
2015-07-17	18:10:00	20	9,4	9	27	2	2	1	3	2	2	2	1	2	1	2	2	1	2	2
				4	-7	1	1	-1	1	1	3	-1	-1	-2	-1	-1	-1	-1	-1	-1	1	1	-1	-2	-2
2015-07-17	18:21:00	20	22,34	22	75	1	3	4	5	4	1	2	1	3	2	3	2	4	1	2	3	2	3	1	1	3	2	3	4	3	1	2	2	2	1	3	1
				34	23	3	4	5	4	-1	-1	1	3	-1	-1	-1	1	-1		-1	2	-1	1	1	-1	-1	1	3	4	-1	1	1	-1	-1	-1	1	1
2015-07-17	18:33:00	20	33,37	33	71	2	3	4	2	2	2	3	3	2	2	2	2	2	2	3	3	2	2	2	3	4	2	2	2	2	2	3	4	2
				37	15	3	4	-2	-1	-1	-1	3	3	-1	-1	-1	2	-1	3	-1	-1	-1	2	3	4	-1	-1	-1	-1	1	-1	2	3	-1
2015-07-17	18:44:00	20	38,19	38	65	1	1	3	1	2	2	1	2	2	2	1	2	2	4	2	2	1	2	1	1	1	2	3	2	1	2	1	2	2	2	2	2	2	2	2	2
				19	-21	1	1	3	-1	-1	-1	-1	1	-1	1	-1	-1	-1	1	-1	-1	-1	-1	-1	-1	-1	-1	-1	-1	-1	-2	1	-1	-1	-1	-1	-1	-1	-1	-1	-1
[truncated: 1 more columns]
